# Supplementary material
Source: PubMed Central journal article supplement (PMC4032119)
Supplement: NIHMS575497-supplement-SF1.pdf [file NIHMS575497-supplement-SF1.pdf]

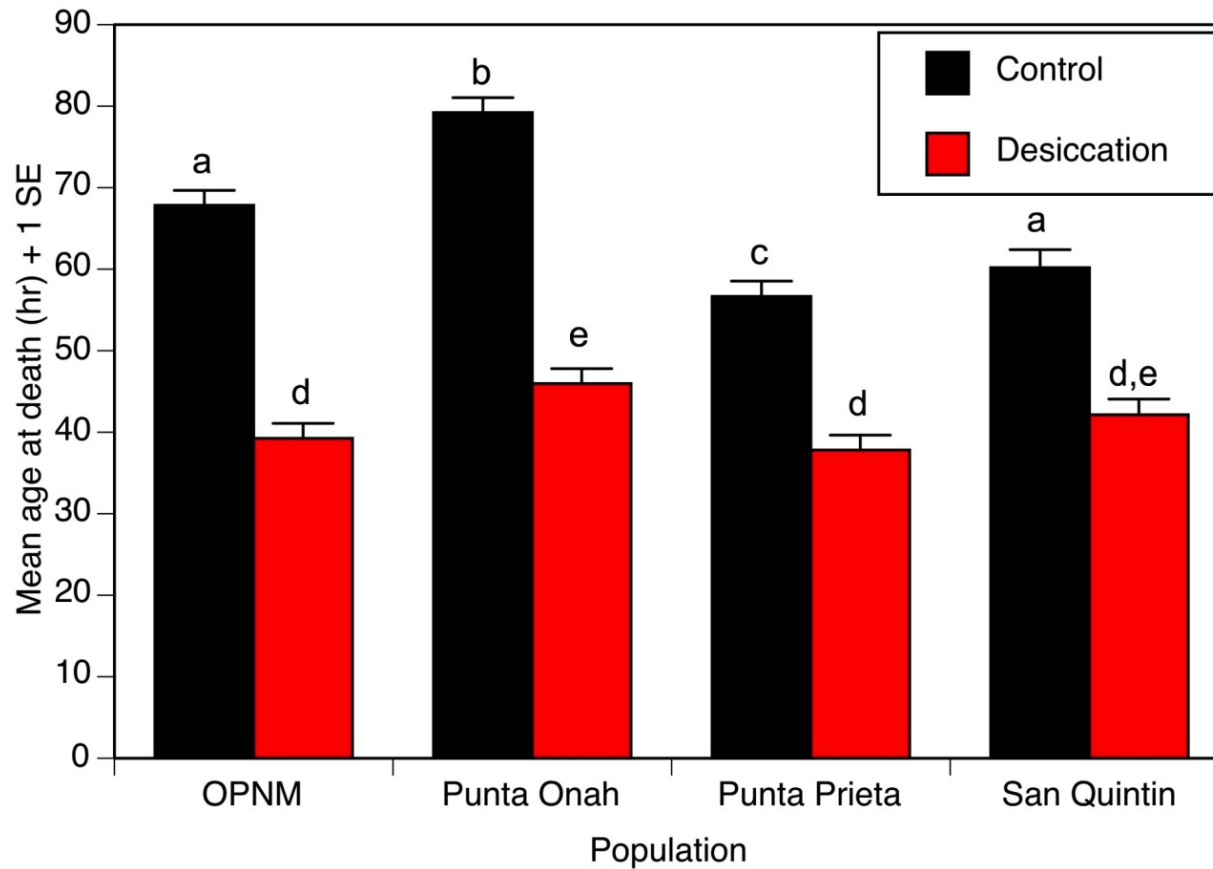

Fig. S1. Age at death of lab food-reared adult *Drosophila mojavensis*, sexes pooled, from four populations in control (ambient humidity) or zero humidity conditions.
