# Supplementary material
Source: PubMed Central journal article supplement (PMC4032119)
Supplement: NIHMS575497-supplement-SF2.pdf [file NIHMS575497-supplement-SF2.pdf]

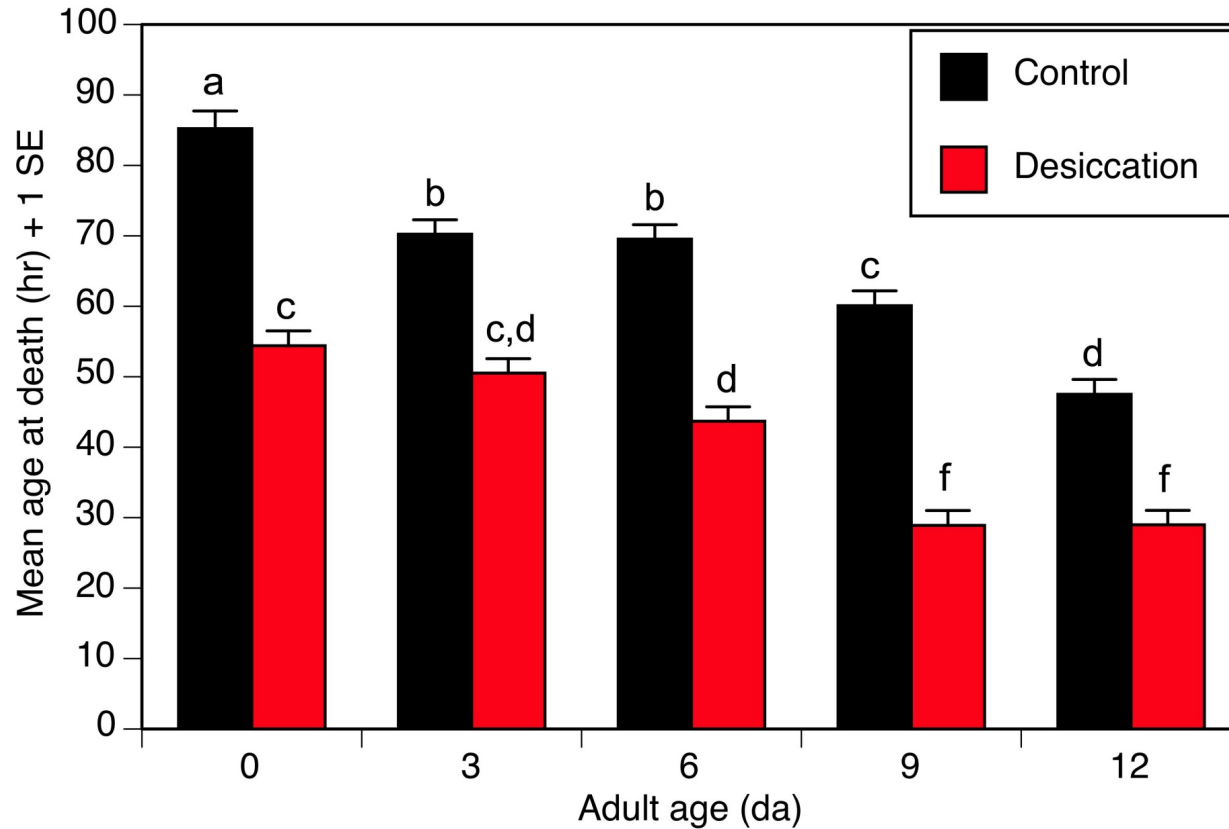

Fig. S2. Age at death of lab food-reared adult *Drosophila mojavensis* from four populations that were of different ages when placed in control (ambient humidity) or zero humidity conditions to start the experiment.
